# Supplementary material
Source: Springer Nature journal article supplement (https://www.springermedizin.de/resource/supplementary/13045_2013_387_MOESM2_ESM.pdf/9661260)

pre-procedure  
January 2005

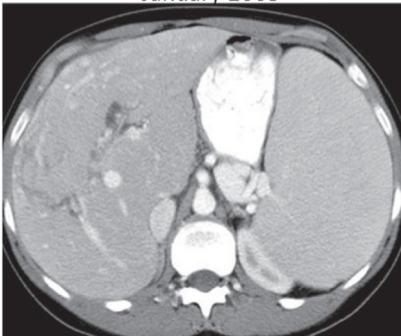

post- first procedure  
June 2005

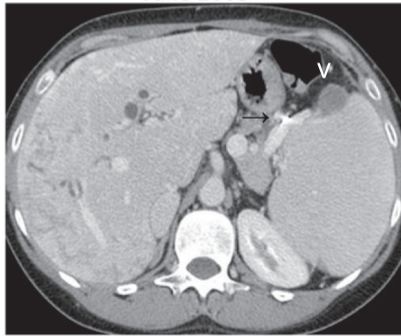

post-second procedure  
July 2006

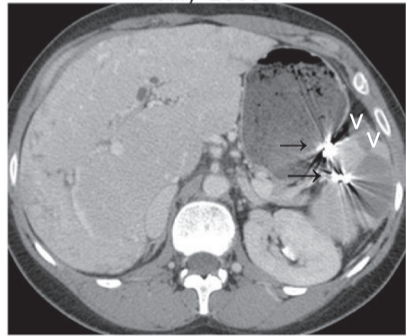

Supplement: MOESM2 [file 9661260]
